# Supplementary material for: Unveiling Clusters of RNA Transcript Pairs Associated with Markers of Alzheimer’s Disease Progression
Source: PLoS One. 2012 Sep 21;7(9):e45535. doi: 10.1371/journal.pone.0045535 (PMC3448659; doi:10.1371/journal.pone.0045535)
Supplement: File S3 — Clusters containing the progression markers (from the 3,763,403 ratio-sum-difference-product metafeatures data set). (XLSX) [file pone.0045535.s014.xlsx]

## Sheet: MMSE
Supporting Information File S3
101	17																	Spearman's rank
MMSE	28	27	25	29	26	24	25	20	21	18	15	17	18	18	17	15	14	1
[ICA1.207949_s_at-ITGB8.205816_at]	8.2e-05	2.6e-05	-5.8e-05	-4e-06	-7e-06	-5.7e-05	-7.2e-05	-6e-05	-3e-05	-6.7e-05	-0.000103	-0.000118	-8.3e-05	-8.7e-05	-0.000107	-0.000134	-0.00017	0.940945
[GABBR2.209990_s_at+BE731738.212661_x_at]	0.018435	0.015205	0.014504	0.016897	0.018389	0.016315	0.014379	0.015125	0.014705	0.013369	0.011704	0.01239	0.012923	0.01271	0.011762	0.01172	0.011963	0.9268
[LTBP1.202728_s_at-ITGB8.205816_at]	-5.6e-05	-4.9e-05	-6.2e-05	7.6e-05	-2.4e-05	-7.6e-05	-7.1e-05	-8.3e-05	-9.3e-05	-6.5e-05	-0.00011	-0.000132	-9.4e-05	-0.0001	-0.000107	-9.5e-05	-0.000157	0.923973
[RRAD.204803_s_at-ITGB8.205816_at]	-3.5e-05	-4.2e-05	-5.8e-05	-2.8e-05	-4.4e-05	-9.2e-05	-4.4e-05	-8.4e-05	-8.5e-05	-7.3e-05	-0.000128	-0.000136	-8.2e-05	-6.8e-05	-0.0001	-0.000148	-0.000162	0.922066
[CSPG5.39966_at*ATP5C1.213366_x_at]	1.2e-05	1.2e-05	1e-05	1.3e-05	1.1e-05	8e-06	1.3e-05	8e-06	9e-06	9e-06	7e-06	8e-06	8e-06	8e-06	5e-06	6e-06	5e-06	0.917444
[ATP5C1.213366_x_at*FXYD6.217897_at]	1e-05	9e-06	7e-06	8e-06	9e-06	8e-06	7e-06	5e-06	6e-06	6e-06	4e-06	6e-06	4e-06	4e-06	5e-06	3e-06	2e-06	0.911438
[MKL2.218259_at+BE731738.212661_x_at]	0.016917	0.013922	0.014196	0.016359	0.018041	0.015204	0.013992	0.013528	0.015176	0.012871	0.011913	0.01235	0.013037	0.013338	0.012528	0.011975	0.012816	0.909957
[BE731738.212661_x_at+ATP2B2.204685_s_at]	0.015874	0.012991	0.013187	0.014897	0.017229	0.014756	0.012576	0.012452	0.013953	0.01176	0.010517	0.011584	0.010575	0.010774	0.011043	0.010366	0.010537	0.908852
[ATP5C1.213366_x_at+KIAA1107.214098_at]	0.004327	0.003457	0.003735	0.003778	0.003801	0.004487	0.003134	0.003082	0.003318	0.003033	0.002601	0.003012	0.003094	0.002411	0.002403	0.00237	0.002292	0.903328
[ICA1.207949_s_at-C10orf76.55662_at]	-2e-06	-6.2e-05	-0.000136	-0.000116	-0.000144	-0.000156	-0.000119	-0.000146	-5.7e-05	-0.000145	-0.000191	-0.000197	-0.000146	-0.00016	-0.00019	-0.000233	-0.000253	0.902256
[BE731738.212661_x_at+KCNQ2.205737_at]	0.015403	0.013612	0.01339	0.016116	0.017164	0.015588	0.013587	0.013449	0.013791	0.012077	0.010993	0.011851	0.011469	0.011159	0.010921	0.011029	0.010879	0.900168
[PRKAR2B.203680_at*BE731738.212661_x_at]	2.3e-05	1.2e-05	1.5e-05	1.9e-05	1.4e-05	1e-05	1.3e-05	1.3e-05	1.1e-05	1e-05	9e-06	1.1e-05	1e-05	1e-05	9e-06	8e-06	9e-06	0.8986
[ATP5C1.205711_x_at*FXYD6.217897_at]	8e-06	7e-06	6e-06	7e-06	6e-06	7e-06	6e-06	6e-06	4e-06	5e-06	3e-06	4e-06	3e-06	3e-06	5e-06	2e-06	2e-06	0.898298
[VCL.200930_s_at-C10orf76.55662_at]	-0.000119	-0.000141	-0.000142	-0.000137	-0.00014	-0.000198	-0.000134	-0.000174	-0.000164	-0.00015	-0.000211	-0.000216	-0.000183	-0.000184	-0.0002	-0.000186	-0.000253	0.897422
[BE731738.212661_x_at+ARF3.200734_s_at]	0.017434	0.016032	0.014958	0.018042	0.020121	0.016938	0.016646	0.01482	0.015362	0.014282	0.012727	0.013084	0.013877	0.012364	0.01327	0.01302	0.013109	0.895376
[RIBC2.206526_at-ITGB8.205816_at]	-7.7e-05	-5.5e-05	-7.2e-05	-1.7e-05	-4.4e-05	-0.000101	-7.9e-05	-9.8e-05	-0.000134	-8.1e-05	-0.000126	-0.000142	-0.00011	-0.00011	-0.000121	-0.000143	-0.000181	0.894556
[CSPG5.39966_at+ATP5C1.213366_x_at]	0.007166	0.007279	0.006177	0.00709	0.006672	0.006035	0.00748	0.005748	0.00616	0.006179	0.005654	0.005526	0.005769	0.005762	0.004615	0.005199	0.004633	0.894256
[AW851559.216056_at-ZBTB20.222357_at]	-0.000343	-0.000498	-0.000342	-0.0003	-0.000336	-0.00041	-0.000414	-0.000537	-0.000543	-0.000427	-0.000618	-0.000571	-0.000516	-0.000553	-0.00064	-0.000586	-0.000629	0.893367
[MYT1L.210016_at+BE731738.212661_x_at]	0.016576	0.014023	0.014759	0.017043	0.01838	0.016469	0.014326	0.01355	0.014411	0.012872	0.011807	0.012204	0.012725	0.011519	0.010999	0.010876	0.0117	0.893136
[BE731738.212661_x_at+AW514267.214945_at]	0.014846	0.012416	0.011688	0.014635	0.01645	0.014308	0.012644	0.012177	0.013804	0.011384	0.010159	0.010895	0.011149	0.010588	0.010036	0.009908	0.01081	0.892278
[RRAD.204803_s_at-KLHL20.204177_s_at]	-0.000243	-0.000275	-0.000303	-0.00019	-0.000335	-0.000349	-0.000274	-0.000304	-0.000356	-0.000343	-0.000364	-0.000358	-0.00037	-0.00043	-0.000442	-0.000513	-0.000403	0.891174
[MAB21L1.206163_at-TTN.208195_at]	-6.4e-05	-6.5e-05	-6.7e-05	-2.6e-05	-6e-05	-6.7e-05	-2.7e-05	-9.6e-05	-9.3e-05	-0.000106	-0.000222	-0.000121	-0.00011	-7.5e-05	-0.000141	-8e-05	-0.000156	0.891049
[ATP5C1.213366_x_at+FXYD6.217897_at]	0.006503	0.005887	0.005458	0.005717	0.005931	0.006025	0.005198	0.004627	0.004813	0.005037	0.00387	0.004838	0.004272	0.004006	0.004551	0.003522	0.002771	0.890893
[AI708767.211978_x_at*FXYD6.217897_at]	4.8e-05	3.3e-05	2.8e-05	3.4e-05	3.9e-05	3e-05	2.9e-05	2.7e-05	2.6e-05	3e-05	1.8e-05	2.3e-05	1.4e-05	2e-05	2.6e-05	1.7e-05	1.2e-05	0.890212
[ATP5C1.213366_x_at*ACACA.212186_at]	6e-06	6e-06	6e-06	5e-06	8e-06	4e-06	5e-06	5e-06	4e-06	4e-06	1e-06	3e-06	3e-06	3e-06	4e-06	3e-06	2e-06	0.888843
[BE731738.212661_x_at-DYNC1I2.211684_s_at]	0.010915	0.008573	0.008081	0.010104	0.012021	0.01047	0.008467	0.008049	0.009699	0.007753	0.006437	0.007476	0.007053	0.006317	0.007374	0.006802	0.00602	0.887859
[LOC100131599.213222_at+BE731738.212661_x_at]	0.017094	0.014739	0.015114	0.018063	0.01896	0.01608	0.014958	0.013732	0.015029	0.013768	0.012529	0.013516	0.013407	0.012726	0.011394	0.011942	0.012771	0.885295
[BE731738.212661_x_at+FXYD6.217897_at]	0.016926	0.013975	0.013207	0.015861	0.018442	0.0156	0.013774	0.013139	0.01483	0.013068	0.010637	0.012375	0.010513	0.01085	0.011823	0.010579	0.010593	0.884544
[BE731738.212661_x_at/C3orf60.209177_at]	23.1572	15.4971	21.9701	21.2072	17.4775	19.3662	16.2146	14.8439	16.2366	11.3643	12.5582	13.7507	14.8798	14.7032	12.9682	12.3959	12.087	0.884365
[LDHA.200650_s_at*FXYD6.217897_at]	1.6e-05	1.2e-05	1.2e-05	1.2e-05	1e-05	1.1e-05	1.2e-05	9e-06	7e-06	1e-05	7e-06	8e-06	5e-06	9e-06	8e-06	5e-06	3e-06	0.882756
[VSNL1.203798_s_at+CSPG5.205344_at]	0.001115	0.000958	0.000849	0.000747	0.000965	0.000759	0.000571	0.000613	0.000796	0.000733	0.000409	0.000531	0.000555	0.000456	0.00025	0.000303	0.00038	0.882189
[ICA1.207949_s_at-KLHL20.204177_s_at]	-0.000126	-0.000207	-0.000303	-0.000166	-0.000298	-0.000314	-0.000302	-0.00028	-0.000301	-0.000337	-0.000339	-0.00034	-0.000371	-0.000449	-0.000449	-0.000499	-0.000411	0.882116
[ALDOB.217238_s_at-ITGB8.205816_at]	-4.4e-05	-4.4e-05	-6.9e-05	-2.3e-05	-2.6e-05	-6.5e-05	-5.2e-05	-9.1e-05	-0.000137	-8.4e-05	-0.000102	-0.000147	-7.6e-05	-0.000108	-0.000121	-0.000125	-0.000177	0.881583
[PRKAR2B.203680_at+BE731738.212661_x_at]	0.014894	0.011903	0.012351	0.01488	0.016775	0.014305	0.012492	0.011772	0.013661	0.011311	0.009835	0.011235	0.010085	0.010008	0.009935	0.009902	0.010523	0.880124
[BE731738.212661_x_at+ACTN1.208636_at]	0.015475	0.01221	0.012322	0.014762	0.017245	0.015012	0.01301	0.012937	0.014238	0.011868	0.010352	0.011737	0.011031	0.011022	0.010991	0.01043	0.01081	0.880124
[MYT1L.210016_at*BE731738.212661_x_at]	4.5e-05	3.5e-05	4.1e-05	4.8e-05	3.9e-05	4e-05	3.4e-05	3.2e-05	2.1e-05	2.6e-05	2.6e-05	2e-05	3.4e-05	2.4e-05	1.8e-05	1.7e-05	2e-05	0.879921
[MDH2.213333_at+NM_005758.206809_s_at]	0.00124	0.000968	0.00096	0.001239	0.001031	0.000944	0.00109	0.000845	0.000934	0.000887	0.000865	0.000697	0.000875	0.000969	0.00067	0.000686	0.000796	0.878925
[BE731738.212661_x_at-UBA3.209115_at]	0.01227	0.009903	0.009622	0.012551	0.014589	0.01207	0.010367	0.009542	0.011273	0.009482	0.007592	0.008868	0.008231	0.007733	0.008312	0.008306	0.008182	0.878574
[FRY.204072_s_at*ATP5C1.213366_x_at]	3e-06	3e-06	3e-06	3e-06	3e-06	2e-06	3e-06	2e-06	1e-06	2e-06	1e-06	2e-06	2e-06	2e-06	1e-06	1e-06	1e-06	0.87856
[PLXNB2.211472_at-C10orf76.55662_at]	-9.8e-05	-0.000125	-5.9e-05	-3.6e-05	-0.000106	-0.000133	-0.000118	-0.000132	-0.000159	-0.000124	-0.000176	-0.000182	-0.000138	-0.000155	-0.000199	-0.000192	-0.000176	0.878511
[PPIA.211765_x_at*FXYD6.217897_at]	4.2e-05	3e-05	2.5e-05	2.9e-05	3.1e-05	3e-05	2.4e-05	2.3e-05	2.2e-05	2.6e-05	1.5e-05	2.1e-05	1.2e-05	1.6e-05	2e-05	1.4e-05	1e-05	0.878305
[IL15.205992_s_at-KLHL20.204177_s_at]	-0.000229	-0.000216	-0.000228	-6.1e-05	-0.000225	-0.000245	-0.000189	-0.000245	-0.000275	-0.000259	-0.00035	-0.000303	-0.000231	-0.000296	-0.000319	-0.000502	-0.000295	0.878287
[BE731738.212661_x_at+TMEM16C.215241_at]	0.015107	0.012575	0.012243	0.014363	0.016998	0.013755	0.012831	0.011884	0.013569	0.011049	0.010587	0.011056	0.010994	0.009764	0.010762	0.009748	0.010946	0.877915
[ENSA.202596_at*NM_005758.206809_s_at]	1e-06	1e-06	1e-06	1e-06	1e-06	1e-06	1e-06	0	1e-06	0	0	0	0	0	0	0	0	0.87702
[BE731738.212661_x_at+PRKCB1.209685_s_at]	0.016804	0.015645	0.014972	0.016522	0.019302	0.014976	0.016786	0.014407	0.014523	0.014173	0.013191	0.014454	0.014416	0.012961	0.013448	0.014092	0.013502	0.87681
[ATP5C1.205711_x_at+FXYD6.217897_at]	0.005894	0.00532	0.004727	0.005463	0.004791	0.005678	0.004859	0.004869	0.004174	0.004703	0.003488	0.004169	0.003766	0.003342	0.004557	0.002729	0.002635	0.876748
[XYLB.208318_s_at-ITGB8.205816_at]	-8.1e-05	-5.9e-05	-7.4e-05	-2.8e-05	-4.2e-05	-9.3e-05	-8.8e-05	-9.2e-05	-0.000144	-8.2e-05	-0.000126	-0.000145	-0.000123	-0.000107	-0.000121	-0.000147	-0.000182	0.875709
[WT1.206067_s_at-ITGB8.205816_at]	-7.6e-05	-5.9e-05	-7.4e-05	-3e-05	-4.1e-05	-0.000104	-9.1e-05	-9.7e-05	-0.000125	-8.4e-05	-0.000119	-0.000134	-0.000118	-0.000109	-0.000114	-0.000149	-0.000184	0.875709
[PRKAR2B.203680_at*PPIA.211765_x_at]	2e-05	1.1e-05	1.6e-05	1.7e-05	1.1e-05	1.1e-05	1.2e-05	1.1e-05	9e-06	9e-06	8e-06	1e-05	9e-06	9e-06	7e-06	8e-06	9e-06	0.875026
[PRKAR2B.203680_at+NDUFV2.202941_at]	0.002658	0.002003	0.002515	0.002211	0.002084	0.002283	0.002042	0.002012	0.001993	0.001834	0.001876	0.001949	0.001882	0.001925	0.001585	0.001679	0.001712	0.874572
[ITGB8.205816_at-AF068863.206909_at]	7.8e-05	4.5e-05	6.1e-05	-5.9e-05	3.5e-05	8.6e-05	8.8e-05	9.7e-05	0.000103	7.8e-05	0.000125	0.000101	9.3e-05	0.000105	0.000122	0.00013	0.000129	-0.88382
[U82303.216702_x_at*FAM107A.209074_s_at]	1e-06	1e-06	2e-06	0	2e-06	2e-06	2e-06	2e-06	3e-06	2e-06	6e-06	4e-06	4e-06	3e-06	5e-06	4e-06	3e-06	-0.88545
[AV712577.201305_x_at-BE731738.212661_x_at]	-0.012561	-0.01023	-0.010327	-0.012938	-0.014985	-0.012417	-0.010419	-0.009709	-0.011652	-0.00971	-0.008221	-0.009039	-0.008259	-0.008067	-0.008192	-0.008092	-0.007829	-0.886415
[FAM107A.209074_s_at*TTN.208195_at]	1e-06	1e-06	1e-06	1e-06	1e-06	2e-06	1e-06	2e-06	2e-06	2e-06	3e-06	3e-06	2e-06	1e-06	3e-06	3e-06	3e-06	-0.887493
[ITGB8.205816_at-AKR1C4.210558_at]	6.3e-05	4.3e-05	4.7e-05	2.8e-05	3.9e-05	0.000103	5.8e-05	9.1e-05	0.000116	8.3e-05	0.000119	0.000143	8e-05	0.000109	0.000119	0.00014	0.000185	-0.887524
[U82303.216702_x_at-TGFB2.209909_s_at]	3.6e-05	7.6e-05	0.000109	-3.1e-05	0.000157	0.000135	9.6e-05	0.000124	0.000111	0.000128	0.000395	0.000176	0.000199	0.00016	0.000242	0.000177	0.000179	-0.887859
[AL049987.213605_s_at-BE731738.212661_x_at]	-0.012429	-0.010469	-0.010718	-0.013238	-0.015013	-0.012981	-0.010798	-0.009838	-0.012175	-0.009932	-0.007791	-0.009589	-0.008427	-0.008319	-0.008321	-0.007316	-0.008116	-0.888833
[U82303.216702_x_at-AK025552.216783_at]	2.5e-05	8e-05	0.000118	1.2e-05	7.2e-05	0.000134	8.4e-05	9.6e-05	0.000138	0.000104	0.000374	0.000154	0.000159	0.000137	0.000244	0.000137	0.000185	-0.888901
[AFF1.201924_at*DOCK4.205003_at]	3e-06	5e-06	4e-06	4e-06	5e-06	5e-06	7e-06	6e-06	6e-06	6e-06	8e-06	7e-06	8e-06	8e-06	7e-06	1.2e-05	1e-05	-0.89195
[MFAP1.203406_at-NM_005758.206809_s_at]	0.000433	0.000534	0.0005	9.4e-05	0.000515	0.000438	0.000319	0.000449	0.000557	0.000646	0.000703	0.000865	0.000657	0.000632	0.000665	0.000696	0.000696	-0.89196
[TCF7L2.212761_at-FXYD6.217897_at]	-0.001757	-0.0016	-0.000413	-0.001029	-0.000936	-0.00046	-0.000816	-0.000374	-0.000447	-0.000855	6e-06	-0.000245	-4.6e-05	6.1e-05	-0.00041	0.001654	0.000755	-0.891981
[PDCD4.212594_at-SCFD1.215548_s_at]	-0.000361	-0.000374	-0.000425	-0.000356	-0.00041	-0.000257	-0.000347	-0.000331	-0.000279	-0.000299	-0.000159	-0.000222	-0.000248	-0.00022	-0.000151	-0.000109	-0.000166	-0.892233
[C10orf76.55662_at-NRG1.206343_s_at]	-2.6e-05	1.1e-05	9.1e-05	4.3e-05	5.2e-05	0.000168	5.8e-05	3.8e-05	9.2e-05	0.000109	0.000194	0.000169	0.000176	0.000122	0.000125	0.000226	0.000257	-0.894158
[QKI.212636_at-BE731738.212661_x_at]	-0.006543	-0.003912	-0.005094	-0.00788	-0.007404	-0.006047	-0.003187	-0.003292	-0.001733	-0.004374	0.001501	0.001546	-0.002987	0.000836	-0.001364	0.001465	0.002793	-0.894256
[TUG1.222244_s_at-FXYD6.217897_at]	-0.001886	-0.001292	-5.1e-05	-0.00073	-1e-05	-0.000262	-0.000226	0.000528	0.000342	3.6e-05	0.000542	4e-05	0.0009	0.000203	0.000866	0.001859	0.00201	-0.895246
[RBM19.205115_s_at-GADD45GIP1.212891_s_at]	-7.2e-05	-1.5e-05	-2.6e-05	-0.000105	-2.1e-05	3e-05	-7e-06	-1.3e-05	4.6e-05	7e-06	9.8e-05	0.000151	0.000175	4e-06	9.6e-05	5.7e-05	0.000202	-0.895593
[MCL1.214057_at-NRG1.206343_s_at]	-5.1e-05	-3.5e-05	0.000108	0.000101	2.4e-05	0.000131	8.1e-05	0.000105	9.6e-05	0.00014	0.000229	0.000193	0.000213	0.000163	0.000135	0.000234	0.000197	-0.896334
[DLG5.201681_s_at-NM_005758.206809_s_at]	-2.1e-05	6.8e-05	-2e-06	-0.000232	4.2e-05	0.000146	9.3e-05	0.000329	9.1e-05	0.000425	0.000262	0.000181	0.000194	0.000138	0.000594	0.000484	0.000515	-0.897803
[CPT2.204264_at/ATP5C1.213366_x_at]	0.019374	0.047813	0.03806	0.029123	0.038698	0.03786	0.031545	0.046033	0.045173	0.050509	0.069913	0.063766	0.061377	0.060831	0.07168	0.056477	0.087918	-0.89851
[TUG1.222244_s_at-SERPINI1.205352_at]	-0.000971	2.9e-05	-0.000148	-0.000487	-0.000354	-0.000442	0.000317	0.0005	0.000675	0.000582	0.000769	0.00078	0.001163	0.000992	0.002521	0.002055	0.001593	-0.900686
[N25732.204131_s_at-PRKAR2B.203680_at]	0.000146	0.000166	6e-06	9.3e-05	0.00038	0.000441	0.000386	0.000486	0.000146	0.000898	0.000838	0.000927	0.000647	0.00052	0.001245	0.002209	0.001107	-0.901883
[C19orf50.200076_s_at-RPS6KB2.203777_s_at]	0.000467	0.000582	0.000546	0.000601	0.000618	0.000629	0.000549	0.000619	0.000605	0.000622	0.000721	0.000731	0.000681	0.000636	0.000865	0.000708	0.00083	-0.902862
[C10orf76.55662_at*RPL23A.203012_x_at]	2e-06	2e-06	2e-06	2e-06	3e-06	3e-06	2e-06	3e-06	3e-06	3e-06	4e-06	4e-06	3e-06	3e-06	3e-06	4e-06	5e-06	-0.903647
[U82303.216702_x_at+NM_018601.220880_at]	7.4e-05	0.000156	0.000214	3.8e-05	0.000187	0.000237	0.000219	0.000252	0.000212	0.000237	0.000523	0.000259	0.000333	0.000237	0.000346	0.000251	0.000278	-0.904215
[U82303.216702_x_at+PTEN.211711_s_at]	0.000184	0.000263	0.000345	0.000195	0.000288	0.000345	0.000286	0.000307	0.000301	0.000364	0.000628	0.000404	0.000422	0.000406	0.000414	0.00043	0.000368	-0.904978
[SDC1.201287_s_at/DDX1.201241_at]	0.111927	0.190476	0.140282	0.123063	0.155875	0.156761	0.162537	0.172253	0.210965	0.216989	0.448732	0.378844	0.302158	0.226986	0.230159	0.219436	0.329238	-0.905038
[ZNF34.219801_at-NRG1.206343_s_at]	-3.2e-05	2.7e-05	6.2e-05	3.7e-05	5.1e-05	0.00013	9.6e-05	6.1e-05	8e-05	0.000156	0.00015	0.000149	0.000161	9.9e-05	0.000168	0.000199	0.000163	-0.905038
[U82303.216702_x_at+SERTAD2.202656_s_at]	0.000506	0.000479	0.000544	0.000413	0.000632	0.000671	0.000638	0.000666	0.000615	0.00061	0.000842	0.000731	0.000792	0.000782	0.000812	0.000815	0.00082	-0.905458
[JPH2.220385_at+NM_024849.220531_at]	1.6e-05	1.7e-05	1.9e-05	1.5e-05	1.5e-05	1.9e-05	1.8e-05	2.5e-05	1.9e-05	1.8e-05	3e-05	2.5e-05	2e-05	1.9e-05	2.2e-05	5.6e-05	3.6e-05	-0.905983
[ZBTB20.222357_at-NRG1.206343_s_at]	0.000237	0.000409	0.000322	0.000347	0.000249	0.000463	0.000339	0.000482	0.000462	0.000386	0.000607	0.000583	0.000573	0.000553	0.000575	0.000574	0.000675	-0.906126
[U82303.216702_x_at+RBM19.205115_s_at]	0.000216	0.000289	0.000343	0.00024	0.00033	0.00042	0.000342	0.000372	0.000355	0.000354	0.000666	0.000423	0.00062	0.000418	0.00057	0.000453	0.00045	-0.906126
[PTMS.218044_x_at+NM_024849.220531_at]	1.4e-05	1.3e-05	1.3e-05	1.4e-05	1.7e-05	1.9e-05	1.7e-05	2.4e-05	2.2e-05	3.4e-05	2.9e-05	2.8e-05	2.2e-05	3.3e-05	3e-05	5.4e-05	6.4e-05	-0.906827
[U82303.216702_x_at+TPP1.214195_at]	8.7e-05	0.00019	0.000237	5.9e-05	0.000226	0.000286	0.000186	0.000212	0.000213	0.00024	0.000491	0.00029	0.000365	0.000247	0.000396	0.000498	0.00038	-0.907747
[KLHL20.204177_s_at+AL359052.214927_at]	0.000373	0.000394	0.000408	0.000372	0.00043	0.000612	0.000458	0.000469	0.000594	0.000503	0.000652	0.00056	0.000617	0.000612	0.000655	0.000684	0.000641	-0.908247
[CASK.211208_s_at-RANBP9.202583_s_at]	-0.000129	7.2e-05	-7e-06	-0.000112	-3.7e-05	9.5e-05	6.2e-05	0.000195	7.3e-05	0.000197	0.000274	0.000257	0.000204	0.000325	0.000166	0.000339	0.000246	-0.909391
[ITGB8.205816_at+PDC.211496_s_at]	9.4e-05	7.6e-05	8.9e-05	7.3e-05	8.3e-05	0.000136	0.000136	0.000152	0.000173	0.000227	0.000228	0.000178	0.000158	0.000172	0.000216	0.000178	0.000217	-0.909414
[KLHL20.204177_s_at+UMOD.206716_at]	0.000334	0.000316	0.00036	0.000206	0.000365	0.000394	0.000344	0.000396	0.000445	0.000395	0.000415	0.000454	0.000457	0.000535	0.000496	0.000541	0.000543	-0.909938
[TSPAN9.220968_s_at-NRG1.206343_s_at]	-1.5e-05	3e-06	8.3e-05	3.4e-05	6.7e-05	0.00016	4.4e-05	7.5e-05	6.6e-05	8.4e-05	0.000204	0.000193	0.000196	0.000111	0.000272	0.000161	0.000279	-0.911567
[CASK.211208_s_at+FOXO1.202724_s_at]	0.000872	0.000874	0.000946	0.00092	0.000976	0.001087	0.000982	0.001109	0.001092	0.001174	0.001354	0.001231	0.001092	0.001216	0.001002	0.001343	0.001219	-0.912054
[C10orf76.55662_at+NM_018601.220880_at]	0.000178	0.000171	0.00018	0.000152	0.000188	0.000218	0.000198	0.000277	0.000191	0.000247	0.000282	0.00025	0.000203	0.000193	0.000243	0.000289	0.00033	-0.912179
[C10orf76.55662_at+OTUB2.219369_s_at]	0.000229	0.000226	0.000196	0.000181	0.000232	0.000239	0.000213	0.000286	0.00024	0.00026	0.000327	0.000367	0.000262	0.000254	0.000287	0.000346	0.000306	-0.912345
[ITGB8.205816_at+NM_014163.220695_at]	0.000102	0.000103	9.5e-05	5e-05	6.9e-05	0.000147	0.000117	0.000124	0.000166	0.000109	0.000239	0.000181	0.000171	0.000139	0.000201	0.000204	0.000227	-0.912637
[SDC1.201287_s_at+FLJ23172.217016_x_at]	0.000186	0.000285	0.000286	0.000235	0.000256	0.000288	0.000268	0.000313	0.000291	0.000354	0.000552	0.000431	0.000496	0.000334	0.000384	0.000317	0.000413	-0.912655
[KLHL20.204177_s_at+PTEN.211711_s_at]	0.000412	0.000423	0.000478	0.000359	0.000443	0.000484	0.000448	0.000466	0.000524	0.000566	0.000535	0.000538	0.000517	0.000651	0.00057	0.000734	0.000578	-0.913272
[BE138647.214314_s_at+AL049242.216101_at]	0.000205	0.000223	0.000243	0.000183	0.000237	0.000309	0.000262	0.000348	0.000257	0.000341	0.000358	0.000493	0.000488	0.000258	0.000465	0.000394	0.000504	-0.915482
[TTN.208195_at/NEFL.221805_at]	0.025771	0.025882	0.073171	0.051348	0.065884	0.054799	0.08129	0.073666	0.086255	0.104709	0.176678	0.116925	0.142964	0.073552	0.158742	0.110603	0.162011	-0.915919
[KLHL20.204177_s_at+C19orf50.200076_s_at]	0.000975	0.001042	0.000956	0.000924	0.001098	0.001275	0.001089	0.001109	0.001127	0.001135	0.001283	0.001336	0.001325	0.001235	0.001423	0.001373	0.001376	-0.916659
[ZNF34.219801_at/FXYD6.217897_at]	0.043467	0.053308	0.058182	0.059524	0.073413	0.084828	0.07377	0.081625	0.081721	0.080567	0.098552	0.098066	0.111875	0.084173	0.088803	0.142588	0.176587	-0.918095
[AL359052.214927_at/ATP5C1.205711_x_at]	0.037108	0.04458	0.033241	0.056573	0.03963	0.066667	0.054981	0.064361	0.080247	0.070227	0.167258	0.092138	0.091413	0.097938	0.108899	0.144239	0.129687	-0.918796
[KLHL20.204177_s_at+SDC1.201287_s_at]	0.000418	0.000471	0.000503	0.000331	0.000535	0.000582	0.000489	0.000507	0.000602	0.000619	0.000776	0.000684	0.000713	0.000659	0.000614	0.00066	0.000698	-0.918796

## Sheet: NFT
51	17																	Spearman's rank
NFT	0.3	1.3	65.8	12	6.4	5.5	7.2	17.4	8	35.2	19	42	22	15.8	30.6	13.8	26.5	1
[CCDC121.220321_s_at+U62966.207560_at]	0.000189	0.000182	0.000357	0.000273	0.000215	0.000177	0.000204	0.000276	0.000224	0.000378	0.000293	0.000294	0.000342	0.000266	0.000276	0.000248	0.000284	0.939664
[CGA.204637_at+PRL.205445_at]	0.000149	0.000169	0.000375	0.000187	0.000143	0.000171	0.000194	0.00027	0.000173	0.00034	0.000202	0.000244	0.000255	0.00019	0.000272	0.00018	0.000278	0.918887
[AL049435.213817_at+U62966.207560_at]	0.000151	0.000191	0.000336	0.00026	0.000178	0.0002	0.000288	0.000305	0.000215	0.000352	0.000304	0.000313	0.000375	0.000303	0.000333	0.000231	0.000361	0.912476
[AL049242.216101_at+U62966.207560_at]	0.000201	0.000222	0.00043	0.000282	0.00027	0.000281	0.000218	0.000362	0.000227	0.000514	0.000356	0.000358	0.000507	0.00031	0.000388	0.000346	0.0004	0.912476
[RNF121.219021_at+GNA14.220108_at]	0.000278	0.000381	0.000597	0.000413	0.00024	0.00039	0.000429	0.000456	0.000419	0.000539	0.000494	0.00049	0.00069	0.00045	0.000536	0.000458	0.000491	0.910216
[U62966.207560_at+WWP1.212637_s_at]	0.000222	0.000239	0.00043	0.000335	0.000276	0.000232	0.000295	0.000365	0.000326	0.000417	0.000422	0.000338	0.000338	0.000327	0.000345	0.000277	0.00038	0.90442
[MED13L.212207_at+U62966.207560_at]	0.000346	0.000321	0.00059	0.000352	0.00027	0.000358	0.000356	0.000478	0.000331	0.000486	0.000455	0.000662	0.000628	0.000467	0.000582	0.000425	0.0005	0.897981
[F9.207218_at+U62966.207560_at]	0.000114	0.000186	0.000339	0.000273	0.000171	0.000182	0.000159	0.000255	0.000224	0.000317	0.000243	0.000292	0.000367	0.000259	0.000325	0.000199	0.000312	0.897533
[U62966.207560_at+C10orf76.55662_at]	0.000252	0.000279	0.000431	0.000339	0.000329	0.000327	0.000294	0.000411	0.000304	0.000474	0.000363	0.000354	0.000424	0.000348	0.000471	0.000369	0.000471	0.890537
[U62966.207560_at+U66059.216597_at]	9.3e-05	0.000133	0.000311	0.000204	0.000173	0.000174	0.000177	0.000257	0.000184	0.000322	0.000268	0.000229	0.000263	0.000253	0.000305	0.000164	0.00022	0.884725
[U62966.207560_at+OTUB2.219369_s_at]	0.000137	0.000197	0.000313	0.000228	0.000189	0.00014	0.000223	0.000321	0.000182	0.000396	0.000248	0.000255	0.000298	0.000222	0.000338	0.000207	0.000233	0.884725
[MMP11.203877_at+PRL.205445_at]	0.000148	0.000165	0.000201	0.000177	0.000138	0.000161	0.000184	0.000252	0.000167	0.000365	0.000182	0.000252	0.000247	0.000185	0.000292	0.000184	0.000192	0.884093
[U62966.207560_at+TEAD3.209454_s_at]	0.000171	0.000185	0.000367	0.000276	0.000208	0.000224	0.000196	0.000278	0.000242	0.000351	0.000303	0.00027	0.000302	0.000262	0.000385	0.000198	0.000294	0.880455
[U62966.207560_at+SPAG1.210117_at]	0.000219	0.000199	0.00042	0.000252	0.000226	0.000279	0.000227	0.000298	0.00026	0.000398	0.000395	0.000283	0.000397	0.000282	0.000405	0.000232	0.000271	0.871197
[TEAD1.214600_at+TOX3.216623_x_at]	0.00019	0.000292	0.00042	0.000414	0.000358	0.000285	0.000286	0.000366	0.000316	0.000401	0.000371	0.000434	0.00034	0.000367	0.000433	0.000331	0.000407	0.867647
[TTN.208195_at+U62966.207560_at]	0.000187	0.000213	0.000421	0.000273	0.000272	0.000267	0.000215	0.00039	0.000278	0.000474	0.000392	0.00034	0.000421	0.000252	0.000478	0.000236	0.000402	0.867043
[TTN.208195_at*LOC100131599.213222_at]	0	0	1e-06	0	0	0	0	1e-06	0	1e-06	1e-06	1e-06	1e-06	0	1e-06	0	1e-06	0.866901
[TTN.208195_at*AP3S1.202442_at]	0	0	1e-06	0	0	0	0	1e-06	0	1e-06	1e-06	1e-06	1e-06	0	1e-06	0	1e-06	0.866901
[CYP3A7.211843_x_at+PRL.205445_at]	0.00014	0.00017	0.000187	0.000178	0.000157	0.000153	0.000174	0.000272	0.000165	0.000327	0.000187	0.000252	0.000264	0.000173	0.000274	0.000172	0.000188	0.865975
[U62966.207560_at+RNMT.202684_s_at]	8.5e-05	0.000152	0.00032	0.00021	0.000183	0.000174	0.000155	0.000275	0.000177	0.000343	0.000188	0.000214	0.00026	0.000206	0.000267	0.000121	0.000217	0.865512
[TCF7L2.212761_at*GNA14.220108_at]	0	0	1e-06	0	0	0	0	1e-06	0	1e-06	1e-06	1e-06	1e-06	1e-06	1e-06	1e-06	1e-06	0.864466
[LOC286434.222196_at+U62966.207560_at]	8.5e-05	0.000131	0.000297	0.000203	0.000163	0.000135	0.000153	0.00025	0.000137	0.000311	0.000153	0.00018	0.000259	0.00018	0.000293	0.000153	0.000213	0.86248
[LOC286434.222196_at+PRL.205445_at]	0.000125	0.000161	0.000184	0.000157	0.000121	0.000147	0.00016	0.000248	0.000166	0.000297	0.00018	0.000278	0.000239	0.000166	0.000256	0.000187	0.000181	0.861916
[MCL1.214057_at+U62966.207560_at]	0.000227	0.000233	0.000448	0.000397	0.000301	0.00029	0.000317	0.000478	0.000308	0.000505	0.000398	0.000378	0.000461	0.000389	0.000481	0.000377	0.000411	0.861243
[ITGB8.205816_at+U62966.207560_at]	0.000168	0.000191	0.000353	0.000227	0.000192	0.000228	0.000247	0.000325	0.000277	0.000396	0.000275	0.000275	0.000361	0.000275	0.000388	0.00027	0.000388	0.86034
[EDC4.202496_at+COX6B1.201441_at]	0.002873	0.003117	0.002307	0.002802	0.002419	0.003172	0.002958	0.002612	0.002817	0.002318	0.002327	0.002065	0.002045	0.002394	0.002211	0.002763	0.002665	-0.851278
[CAST.212586_at+COX6B1.201441_at]	0.003512	0.003633	0.003002	0.003461	0.003325	0.004105	0.003521	0.00345	0.004162	0.00287	0.003189	0.003154	0.002737	0.003248	0.003143	0.003221	0.003197	-0.8518
[TMPRSS5.221032_s_at+COX6B1.201441_at]	0.002762	0.002891	0.002195	0.00282	0.002613	0.003311	0.003015	0.002465	0.002842	0.00228	0.002298	0.002238	0.002155	0.002388	0.002261	0.002563	0.002521	-0.852748
[SIRT3.221562_s_at+COX6B1.201441_at]	0.002843	0.003024	0.002264	0.002783	0.002463	0.003026	0.002916	0.002434	0.002804	0.002297	0.002453	0.002188	0.002028	0.002398	0.002286	0.002555	0.002601	-0.853502
[UPF1.211168_s_at+COX6B1.201441_at]	0.002937	0.00303	0.002386	0.002886	0.002585	0.003181	0.003158	0.002773	0.002941	0.002465	0.002542	0.002276	0.002442	0.002559	0.002476	0.002866	0.002836	-0.854046
[COX6B1.201441_at+ACCN1.206690_at]	0.003558	0.003402	0.00232	0.003035	0.002603	0.003137	0.003204	0.002598	0.002742	0.002403	0.002358	0.002157	0.002076	0.002374	0.00253	0.002847	0.00261	-0.854839
[COX6B1.201441_at+ACTN1.211160_x_at]	0.002788	0.00308	0.002361	0.002892	0.002613	0.003096	0.003082	0.002597	0.002833	0.002334	0.00243	0.002031	0.002172	0.002608	0.002282	0.002706	0.00247	-0.855012
[NUP98.203195_s_at+COX6B1.201441_at]	0.002728	0.002876	0.002189	0.002657	0.00235	0.002921	0.002728	0.002374	0.002708	0.002116	0.002297	0.001966	0.002032	0.002352	0.002156	0.002611	0.002605	-0.855274
[DET1.219641_at+COX6B1.201441_at]	0.002939	0.00305	0.002375	0.002699	0.002723	0.003103	0.003036	0.002579	0.002885	0.002332	0.002375	0.002143	0.002191	0.002421	0.002406	0.002641	0.002727	-0.856222
[COX6B1.201441_at+LZTS1.219042_at]	0.003101	0.003066	0.002268	0.00296	0.002399	0.002851	0.003004	0.002442	0.002688	0.002173	0.002356	0.002047	0.001939	0.002334	0.002291	0.002492	0.002677	-0.856973
[ANKRD34C.216073_at+COX6B1.201441_at]	0.002748	0.002912	0.002152	0.002656	0.002372	0.002883	0.00284	0.002589	0.00268	0.002217	0.002281	0.001949	0.001888	0.002281	0.002126	0.002595	0.002555	-0.858447
[C20orf111.209020_at+COX6B1.201441_at]	0.002956	0.003038	0.002386	0.002911	0.002639	0.003368	0.003019	0.00253	0.002937	0.002434	0.002459	0.002206	0.002074	0.002558	0.002205	0.002631	0.002753	-0.860174
[PRKCI.213518_at-HBG2.213515_x_at]	0.000375	0.000357	5.6e-05	0.000122	0.000307	0.000336	0.000263	0.000141	0.000415	5.1e-05	5.8e-05	-8.9e-05	0.000254	0.000249	0.00021	0.000166	0.00012	-0.862526
[COX6B1.201441_at+CYP26B1.219825_at]	0.003049	0.003104	0.002284	0.00258	0.002511	0.002989	0.002932	0.00254	0.002783	0.002314	0.002388	0.002058	0.001824	0.002405	0.002174	0.002731	0.002703	-0.862526
[COX6B1.201441_at+DBNDD1.222234_s_at]	0.002962	0.003228	0.002202	0.002823	0.002509	0.002876	0.002997	0.002437	0.002842	0.002316	0.002309	0.002143	0.002041	0.002371	0.002171	0.002717	0.002688	-0.864412
[UBE3B.213822_s_at+COX6B1.201441_at]	0.002809	0.002854	0.002202	0.00274	0.002558	0.003064	0.002814	0.00249	0.002779	0.002181	0.00221	0.002002	0.002082	0.002255	0.002137	0.002514	0.00259	-0.866846
[IRF2BP1.213771_at+COX6B1.201441_at]	0.00303	0.003237	0.002339	0.002819	0.002655	0.003633	0.003174	0.002853	0.002872	0.002459	0.002503	0.002095	0.002351	0.00255	0.002533	0.002789	0.002782	-0.86907
[COX6B1.201441_at+PCSK1.205825_at]	0.003093	0.003007	0.002104	0.002572	0.002489	0.002936	0.002739	0.002666	0.002801	0.00218	0.002179	0.002084	0.001867	0.002352	0.00215	0.002379	0.002559	-0.871917
[IRF2BP1.213771_at+NM_005758.206809_s_at]	0.000906	0.000813	0.000599	0.000893	0.000793	0.001178	0.00084	0.00077	0.000707	0.000561	0.000694	0.000413	0.000751	0.000775	0.000658	0.000603	0.000697	-0.873364
[B3GALT2.210121_at+COX6B1.201441_at]	0.002978	0.002921	0.002136	0.00269	0.002364	0.002875	0.002847	0.002575	0.002794	0.002229	0.002262	0.001946	0.001889	0.002307	0.00227	0.002616	0.002645	-0.874051
[SNCG.209877_at+COX6B1.201441_at]	0.00315	0.003548	0.002314	0.002971	0.002705	0.00305	0.003339	0.002363	0.002844	0.002416	0.002481	0.002137	0.001914	0.002424	0.002285	0.002792	0.00259	-0.8754
[COX6B1.201441_at+RGS4.204339_s_at]	0.003677	0.003462	0.002435	0.003008	0.002721	0.003139	0.003018	0.002841	0.002992	0.002551	0.002576	0.002232	0.002172	0.002624	0.002586	0.002762	0.002761	-0.884725
[ALDOB.217238_s_at-PRL.205445_at]	-7.6e-05	-0.000133	-0.000151	-0.000136	-7.8e-05	-7.7e-05	-0.000116	-0.00021	-0.000135	-0.000284	-0.000138	-0.000212	-0.000155	-0.000135	-0.000218	-0.000119	-0.000155	-0.894219
[ICA1.207949_s_at+NPAL3.210267_at]	0.000193	0.000157	3.9e-05	4.6e-05	9.9e-05	9.5e-05	7.1e-05	4.9e-05	0.000139	3.9e-05	4.4e-05	4.3e-05	6.6e-05	6.8e-05	5.7e-05	8.5e-05	4.8e-05	-0.895877
[COX6B1.201441_at+SORBS2.204288_s_at]	0.003188	0.003337	0.002505	0.003095	0.00275	0.003109	0.00318	0.0029	0.002856	0.002474	0.002602	0.002268	0.002172	0.002733	0.002524	0.003003	0.002723	-0.89721

## Sheet: JSD(P,Pc)
51	17
JSD(P-Pc)	0.009619	0.009008	0.015715	0.036578	0.007778	0.009432	0.012278	0.016187	0.011171	0.022746	0.007379	0.020685	0.009152	0.01614	0.02256	0.017785	0.035503	1
[RBM19.205115_s_at-KCNK5.219615_s_at]	5.9e-05	5.6e-05	7.8e-05	0.000111	5e-05	6.9e-05	7.4e-05	5.7e-05	6.8e-05	0.000109	4.4e-05	0.000101	5.5e-05	7.8e-05	0.000103	6.7e-05	0.000107	0.886487
[KLK3.204582_s_at-LOC645961.215320_at]	6e-06	1.1e-05	1.1e-05	1.4e-05	8e-06	-4e-06	1.2e-05	1.4e-05	8e-06	4.7e-05	4e-06	1.7e-05	-2.8e-05	1.2e-05	1.6e-05	1.2e-05	2e-05	0.875436
[N25732.204131_s_at-MAST3.213045_at]	4.2e-05	-0.000672	-0.000209	0.00034	-0.000416	-0.00016	-7.2e-05	6.4e-05	-0.000141	0.00031	-0.000299	0.000424	-0.000263	-0.000102	0.000592	0.002033	0.000532	0.85816
[KLK3.204582_s_at-KYNU.210662_at]	6e-06	-8e-06	1.4e-05	1.3e-05	-2e-06	5e-06	1.1e-05	1.7e-05	9e-06	4.5e-05	-1.5e-05	1.6e-05	-9e-06	-2e-06	1.6e-05	1.1e-05	2.2e-05	0.856764
[RBM19.205115_s_at-AGTR1.208016_s_at]	0.000108	6.8e-05	0.000105	0.000179	6.6e-05	8.9e-05	0.000104	0.000121	0.00011	0.000164	7.7e-05	0.000139	0.000112	0.000148	0.000135	0.000158	0.000118	0.856409
[ZNF669.220215_at-GEMIN6.219539_at]	9.4e-05	7.3e-05	0.000115	0.000141	2e-05	8.9e-05	6.8e-05	0.00014	0.000114	0.000307	8.5e-05	0.000205	7.4e-05	9.9e-05	0.000247	0.000296	0.000198	0.853995
[KLK3.204582_s_at-BG482805.214777_at]	-1e-06	5e-06	6e-06	1.1e-05	0	4e-06	6e-06	1.3e-05	5e-06	4.2e-05	-8e-06	1e-05	2e-06	4e-06	6e-06	7e-06	1.3e-05	0.853527
[KLK3.204582_s_at/MAST3.213045_at]	0.004231	0.006138	0.009622	0.015125	0.006064	0.011687	0.009282	0.011585	0.008432	0.033069	0.003285	0.013681	0.009606	0.007937	0.011772	0.013749	0.015202	0.852532
[TUBD1.210389_x_at-ESR1.205225_at]	-9e-06	-4.4e-05	-4.9e-05	3.6e-05	-4.6e-05	-6e-06	-2.7e-05	2.3e-05	2.3e-05	6.9e-05	-8.1e-05	5.9e-05	-8e-05	-3e-06	8.7e-05	6e-06	4e-05	0.852098
[CASP4.213596_at-LOC90379.221851_at]	6e-06	-5.2e-05	-4e-05	0.000144	-8.2e-05	-4.4e-05	0	7.8e-05	-7.2e-05	8.3e-05	-0.000154	-3.4e-05	-2.5e-05	1.6e-05	3.7e-05	4.1e-05	9.2e-05	0.848467
[KLK3.204582_s_at-MLLT4.208512_s_at]	2e-06	6e-06	9e-06	1.1e-05	3e-06	9e-06	1e-05	1.2e-05	4e-06	4.6e-05	-6e-06	1.7e-05	9e-06	8e-06	1.3e-05	1.1e-05	1.8e-05	0.846819
[GABRQ.220886_at+RBMS1.203748_x_at]	0.000293	0.000291	0.000426	0.000456	0.000227	0.000266	0.00036	0.000389	0.000255	0.000404	0.000245	0.000324	0.000259	0.000298	0.000344	0.000364	0.000424	0.844336
[MMP11.203876_s_at-SCGB1D2.206799_at]	4e-05	-2e-06	2.4e-05	9.6e-05	3.1e-05	-0.000159	2.5e-05	3.9e-05	-1.3e-05	0.000115	-4.9e-05	6.5e-05	-1.9e-05	4.6e-05	4.5e-05	4.7e-05	0.000138	0.838775
[CASP4.213596_at-AF043586.216394_x_at]	6.5e-05	8.1e-05	8.2e-05	0.000202	3.7e-05	8.8e-05	9.4e-05	7.3e-05	8.3e-05	0.000136	3.3e-05	0.000149	-1e-06	8.6e-05	0.000104	0.000145	0.000101	0.835322
[RBM19.205115_s_at-AF043586.216394_x_at]	8.9e-05	0.000134	0.000134	0.000185	0.000106	0.000127	0.000154	0.000184	0.000134	0.000174	0.000132	0.000161	0.000148	0.000163	0.000197	0.000199	0.0002	0.834155
[TMBIM1.217730_at*RBM4.200997_at]	0	0	0	1e-06	0	0	0	0	0	1e-06	0	1e-06	0	1e-06	1e-06	1e-06	1e-06	0.833134
[AL080106.216121_at-BTN2A2.205298_s_at]	-0.000137	-0.000174	-0.000169	-0.000118	-0.000171	-0.000149	-0.000133	-0.000131	-0.000209	-6.6e-05	-0.000176	-0.000113	-0.000138	-0.000115	-7.8e-05	-8.4e-05	-9.4e-05	0.833121
[ZNF669.220215_at-TBXA2R.207554_x_at]	3.3e-05	0.000106	4.2e-05	0.000132	-2e-05	8.2e-05	0.000123	0.000127	9.1e-05	0.000252	-6e-06	0.000124	3.1e-05	6.4e-05	0.000258	0.000355	0.000171	0.832963
[ZNF669.220215_at-LOC90379.221851_at]	0.000107	6.8e-05	4.8e-05	0.000186	-1.1e-05	0.000122	0.000147	0.00021	7.9e-05	0.000285	-2.8e-05	0.00014	0.000105	0.000169	0.000319	0.000338	0.000239	0.832263
[SLC11A1.217507_at-SCGB1D2.206799_at]	-2e-06	8e-06	3.2e-05	9.8e-05	-1.3e-05	-6.1e-05	2.1e-05	9e-05	-6.1e-05	7.7e-05	-8.2e-05	3.2e-05	-1.8e-05	4.4e-05	0.000231	5e-06	4.4e-05	0.83103
[KLK3.204582_s_at-CSH2.208342_x_at]	-6e-06	-2e-06	3e-06	9e-06	-6e-06	-4e-06	5e-06	1e-06	2e-06	4e-05	-1.1e-05	6e-06	-6e-06	0	1e-06	-1e-06	5e-06	0.824365
[CENPE.205046_at-KYNU.210662_at]	1.7e-05	-1e-06	2e-05	3.2e-05	0	6e-06	4e-06	8e-06	1.1e-05	2.3e-05	-1.3e-05	1.5e-05	6e-06	2e-06	2.4e-05	1.9e-05	3.3e-05	0.823506
[ZNF669.220215_at-SCGB1D2.206799_at]	0.000211	0.000205	0.000163	0.000253	0.000124	9.3e-05	0.000245	0.000214	0.000148	0.000335	0.000129	0.000328	0.000173	0.000248	0.00042	0.000464	0.000264	0.823429
[TUBD1.210389_x_at-IGSF6.206420_at]	8.6e-05	5.3e-05	5.6e-05	0.000146	8.4e-05	5e-06	4.2e-05	8.6e-05	0.000118	0.000189	3.1e-05	0.000106	4.1e-05	0.000104	0.000182	9.7e-05	0.000125	0.819997
[U62966.207560_at-NUFIP1.205136_s_at]	-0.000373	-0.00028	-0.000233	-0.000207	-0.000305	-0.000314	-0.000269	-0.00025	-0.00032	-0.000202	-0.000384	-0.000263	-0.000263	-0.000242	-0.000135	-0.000226	-0.000239	0.817348
[IRF2BP1.213771_at-AU155105.214782_at]	0.000251	0.000322	0.000169	2.2e-05	0.000265	0.000795	0.000241	0.000178	0.000159	6.1e-05	0.000245	0.0001	0.000246	0.000233	0.000151	-6.1e-05	0.000171	-0.818812
[LUZP4.220665_at-ZNF669.220215_at]	-8.1e-05	-5.5e-05	-8.1e-05	-0.000131	-7.3e-05	-9.7e-05	-0.000144	-0.00015	-0.000106	-0.000179	0.000135	-0.000206	3.5e-05	-0.000121	-0.000404	-0.000351	-0.000138	-0.819605
[TXNDC9.203008_x_at+MAST3.213045_at]	0.002304	0.002456	0.002346	0.00183	0.002351	0.002373	0.002108	0.002018	0.001946	0.001999	0.002525	0.00217	0.002606	0.002187	0.001916	0.001345	0.00197	-0.820189
[SMAD3.205398_s_at-KLK3.204582_s_at]	2.7e-05	0.000149	1.7e-05	1.2e-05	3.4e-05	2.1e-05	9e-06	1.3e-05	2.4e-05	-1.5e-05	1.8e-05	5e-06	3e-05	2e-05	1.2e-05	1e-06	-8e-06	-0.820467
[ALDOB.217238_s_at+PDE4D.211840_s_at]	5e-05	4.6e-05	3e-05	2.2e-05	5.5e-05	6.5e-05	5.2e-05	3.2e-05	3.9e-05	1.9e-05	5.2e-05	2.8e-05	6.9e-05	2.8e-05	2.1e-05	4.1e-05	3.5e-05	-0.820914
[BF691447.221484_at*UBP1.218082_s_at]	1e-06	1e-06	1e-06	0	1e-06	1e-06	0	0	1e-06	0	1e-06	0	1e-06	1e-06	0	0	0	-0.821237
[BF691447.221484_at*RNMT.202683_s_at]	1e-06	1e-06	1e-06	0	1e-06	1e-06	0	0	1e-06	0	1e-06	0	1e-06	1e-06	0	0	0	-0.821237
[SLC9A3R2.215735_s_at-PSME3.209853_s_at]	0.000146	0.000276	9.7e-05	-2.4e-05	0.000311	0.000185	0.000148	-2e-05	0.000121	-3.4e-05	7.9e-05	-7.2e-05	0.000239	0	7.1e-05	7.2e-05	1.1e-05	-0.82473
[LOC90379.221851_at-U66059.216597_at]	0.000105	0.000141	0.000103	7e-05	0.000128	0.000133	9.4e-05	-1.4e-05	0.000113	5.7e-05	0.000133	9.5e-05	0.000139	-4e-06	8.3e-05	9.3e-05	1.8e-05	-0.82552
[TREX1.34689_at-Mar-03.213256_at]	0.000659	0.000545	0.000508	0.00029	0.000827	0.000708	0.000532	0.000618	0.000528	0.000463	0.000659	0.000361	0.000752	0.000301	0.000462	0.000306	0.000443	-0.826153
[AW408767.217608_at-MMP11.203876_s_at]	2.6e-05	3.5e-05	3.1e-05	-8.3e-05	1e-05	2.9e-05	4e-06	5e-06	3.1e-05	-7.5e-05	2.7e-05	-3.2e-05	1.7e-05	-7e-06	-1.3e-05	-2.3e-05	-8.1e-05	-0.827628
[PURA.213806_at-CENPE.205046_at]	-5e-06	-1.1e-05	-6e-06	-2.3e-05	1e-06	4e-06	-1e-06	-2e-06	-3e-06	-1.8e-05	5e-06	-9e-06	3e-05	-1.2e-05	-1.6e-05	-1.3e-05	-2.6e-05	-0.830698
[C20orf111.209020_at-PSME3.209853_s_at]	0.000197	0.000174	0.000113	1.7e-05	0.000226	0.000435	0.000139	0.000127	0.000151	5.3e-05	0.000153	0.000104	0.000266	0.000212	5e-05	3.9e-05	8e-05	-0.834539
[FLJ39739.217136_at-CASP4.213596_at]	-9.2e-05	-7.2e-05	-5.7e-05	-0.000157	-6.3e-05	-0.000108	-0.000113	-8.8e-05	-9.9e-05	-0.000156	-4.5e-05	-0.000152	-8.2e-05	-9.3e-05	-0.000138	-0.000114	-0.000122	-0.837092
[KCNJ5.208397_x_at-ZNF669.220215_at]	-0.000195	-0.000181	-0.000177	-0.000258	-0.000109	-0.000202	-0.000257	-0.000221	-0.000224	-0.00035	-0.000169	-0.000308	-0.000199	-0.000246	-0.000379	-0.000432	-0.00026	-0.839303
[ALDOB.217238_s_at-TNFSF14.207907_at]	3.8e-05	1.8e-05	5e-06	-6e-06	1.8e-05	3.2e-05	3.7e-05	1e-06	2e-06	-2e-06	1.3e-05	-2e-06	4.5e-05	2e-06	-8e-06	-1e-06	-1.4e-05	-0.840126
[DIABLO.219350_s_at+MAST3.213045_at]	0.002757	0.003145	0.003014	0.001858	0.003229	0.002698	0.002718	0.002442	0.002843	0.00241	0.003116	0.002656	0.003195	0.002959	0.002604	0.001786	0.002469	-0.840391
[ALDOB.217238_s_at-CASP4.213596_at]	-8e-05	-7.5e-05	-9e-05	-0.000214	-5.3e-05	-0.0001	-7.6e-05	-8.7e-05	-8.5e-05	-0.00015	-7.4e-05	-0.000162	-9.2e-05	-9.8e-05	-0.000158	-0.000153	-0.000119	-0.841686
[ICA1.207949_s_at+GCNT3.219508_at]	0.000178	0.000113	7e-05	4.2e-05	0.0001	9.4e-05	7.3e-05	5.8e-05	0.000137	3.6e-05	0.000111	5.7e-05	0.000116	5.6e-05	4.1e-05	6.3e-05	4.1e-05	-0.841878
[TRIM26.202702_at/KLK3.204582_s_at]	45.625	41.9167	29.8667	21.6471	46.5	33.5	34.6667	24.6842	35.2	15	47.1429	19.8095	22.15	30.8571	23	21.0667	15	-0.843015
[S80491.216974_at-MMP11.203876_s_at]	-5.1e-05	-9e-06	-4.8e-05	-0.000104	-5.2e-05	-5.8e-05	-4.5e-05	-5.3e-05	-6.8e-05	-0.000137	5e-06	-7.8e-05	-1.5e-05	-5.7e-05	-7e-05	-6.1e-05	-0.00015	-0.846339
[NDUFV2.202941_at+MAST3.213045_at]	0.002762	0.002841	0.00273	0.001964	0.00288	0.002884	0.0025	0.002434	0.00228	0.002422	0.003013	0.002452	0.002792	0.002547	0.002238	0.001855	0.002287	-0.85114
[ALDOB.217238_s_at+SMAD3.205398_s_at]	7.9e-05	0.000183	4.2e-05	4e-05	6.7e-05	8.6e-05	6.7e-05	4.3e-05	5.1e-05	4.2e-05	5.6e-05	3.3e-05	0.000105	4.3e-05	3.7e-05	4.6e-05	2.7e-05	-0.854497
[AKR1B1.201272_at/KLK3.204582_s_at]	169.25	135.333	96.9333	91.1176	166.6	134.75	119.6	91.4211	173.1	30.22	254.143	87.1905	113.3	122.214	79.1579	79.8	75.8696	-0.860018
[KCNJ5.208397_x_at-CASP4.213596_at]	-9.4e-05	-6.1e-05	-8.9e-05	-0.000216	-3.8e-05	-3.6e-05	-0.00011	-8.9e-05	-7.3e-05	-0.000148	-4.3e-05	-0.000134	-6.9e-05	-9.3e-05	-9.7e-05	-0.000135	-0.000113	-0.861109

## Sheet: JSD(P,Ps)
51	17
JSD(P-Ps)	0.026443	0.019046	0.019223	0.024361	0.0431	0.027186	0.023212	0.018014	0.035927	0.015277	0.025848	0.015108	0.030925	0.0171	0.01943	0.016296	0.019163	1
[TREX1.34689_at+NM_005758.206809_s_at]	0.0012	0.000954	0.001033	0.001197	0.001282	0.001297	0.001097	0.001059	0.001286	0.000761	0.001111	0.000793	0.001128	0.000955	0.001098	0.000835	0.000908	0.933423
[ESR1.205225_at-AL050026.216626_at]	0.000135	0.000101	9.7e-05	0.000115	0.000201	0.000112	0.000132	7.9e-05	0.000146	4.5e-05	0.000195	6.9e-05	0.000192	7.9e-05	9.5e-05	9.5e-05	9.2e-05	0.910083
[VSNL1.203798_s_at-AKAP12.210517_s_at]	-0.000205	-0.000495	-0.000425	-0.000361	-0.000102	-0.000127	-0.000512	-0.000606	-0.000231	-0.000887	-0.000418	-0.00066	-0.000233	-0.000795	-0.00024	-0.000469	-0.000726	0.877939
[PURA.213806_at-APOH.205216_s_at]	4e-06	-2e-06	2e-06	1e-06	8e-06	2e-06	0	-3e-06	5e-06	-3e-06	8e-06	-1.8e-05	2.9e-05	-3.3e-05	4e-06	-2e-06	-8e-06	0.872983
[PTEN.222176_at-AL050026.216626_at]	-1e-06	-3.5e-05	-2e-05	-2.3e-05	1.3e-05	2.6e-05	4e-06	-6.3e-05	3.6e-05	-0.000141	-6e-06	-3.7e-05	9.1e-05	-5.7e-05	-3.7e-05	-3.9e-05	-7.7e-05	0.870794
[MAPK1.208351_s_at+UBE3B.213822_s_at]	0.000428	0.000335	0.000325	0.000389	0.000506	0.000551	0.000306	0.000364	0.000399	0.000315	0.000373	0.000261	0.00049	0.000341	0.000371	0.000305	0.000355	0.867901
[TREX1.34689_at*COX6A1.200925_at]	8e-06	7e-06	7e-06	7e-06	1e-05	9e-06	6e-06	6e-06	8e-06	6e-06	8e-06	5e-06	7e-06	4e-06	7e-06	5e-06	7e-06	0.864481
[CNOT1.200861_at-GABRQ.220886_at]	0.00042	0.000364	0.000417	0.000435	0.000483	0.000497	0.000439	0.000396	0.000435	0.000311	0.000489	0.000297	0.000524	0.000264	0.000425	0.000369	0.00042	0.856692
[UBE3B.213822_s_at+ADK.204119_s_at]	0.00051	0.000352	0.000452	0.000462	0.000647	0.000571	0.000324	0.000432	0.000561	0.000356	0.000466	0.000309	0.000453	0.000322	0.00038	0.000361	0.000453	0.847332
[LILRA5.215838_at-PTEN.211711_s_at]	-2.4e-05	-5.9e-05	-6e-05	-5.5e-05	-2.2e-05	-4e-05	-3.6e-05	-9.9e-05	-2.8e-05	-0.000162	-2.7e-05	-7.6e-05	3.8e-05	-0.00015	-7e-06	-0.000104	-5e-05	0.844501
[MTSS1.210360_s_at-PTEN.211711_s_at]	-4.6e-05	-5.2e-05	-0.000113	-1.8e-05	1.8e-05	-5.1e-05	-4.9e-05	-9.7e-05	-4e-05	-0.000115	-7.1e-05	-8.3e-05	0.000153	-0.000104	-5.1e-05	-0.000122	-6.4e-05	0.843329
[S80491.216974_at-PTEN.211711_s_at]	-0.000113	-0.000123	-0.000153	-0.000157	-0.000101	-0.000108	-0.000122	-0.000142	-7.5e-05	-0.000203	-0.000108	-0.00016	-2.8e-05	-0.000171	-0.0001	-0.000212	-0.000146	0.842751
[MLLT4.208512_s_at/PTEN.211711_s_at]	0.051724	0.048387	0.038961	0.03681	0.067961	0.061947	0.04065	0.048611	0.060606	0.019512	0.078313	0.024691	0.112245	0.034884	0.059406	0.018692	0.033784	0.842239
[P2RY10.214615_at-AL050026.216626_at]	-2e-06	-1.8e-05	-4.7e-05	3e-06	1.3e-05	-3e-06	-8e-06	-3.9e-05	2.6e-05	-0.000129	2.9e-05	-3.8e-05	3e-06	-6.1e-05	-2.5e-05	-5.1e-05	-8.8e-05	0.842191
[TTK.204822_at-PTEN.211711_s_at]	-7e-05	-9.1e-05	-0.000127	-0.0001	-8.4e-05	-7.2e-05	-7.1e-05	-0.000122	-5.2e-05	-0.000145	-7.5e-05	-0.00013	-8.1e-05	-0.000135	-8.9e-05	-0.000184	-9.8e-05	0.840396
[FLJ39739.217136_at-PTEN.211711_s_at]	-8.4e-05	-9.9e-05	-0.000111	-9.5e-05	-9e-05	-7.2e-05	-0.000117	-0.000134	-9.6e-05	-0.000204	-0.000106	-0.000145	-3.3e-05	-0.000158	-7.5e-05	-0.000145	-0.000139	0.837966
[UBE3B.213822_s_at+ATRN.212517_at]	0.001073	0.000808	0.001228	0.001031	0.001255	0.001125	0.000962	0.000965	0.001159	0.000707	0.001022	0.000853	0.001058	0.000942	0.000908	0.000752	0.00096	0.836922
[TREX1.34689_at+RPS24P2.217188_s_at]	0.000972	0.000893	0.00078	0.000882	0.001224	0.000997	0.000913	0.000946	0.001134	0.000858	0.000966	0.000695	0.000954	0.000745	0.00106	0.000695	0.000745	0.83673
[UBE3B.213822_s_at-FOLH1.217483_at]	0.000233	4.6e-05	7.5e-05	0.00014	0.00032	0.000107	7.8e-05	0.000127	0.000134	-1.9e-05	7.3e-05	-3.9e-05	0.00016	-1e-05	0.000156	-6e-06	6.9e-05	0.835834
[SCGB2A1.205979_at-APOH.205216_s_at]	-7e-06	-7e-06	-2e-06	4e-06	0	0	-3e-06	-8e-06	6e-06	-1e-05	-3e-06	-2.6e-05	1.1e-05	-3.6e-05	-2e-06	-9e-06	-9e-06	0.83274
[AJ302559.216818_s_at-KLK3.204582_s_at]	9e-06	-2e-06	-3e-06	4.9e-05	5e-06	5.4e-05	2e-06	-7e-06	2.3e-05	-1.8e-05	6e-06	-1.5e-05	-2e-06	-3e-06	0	-4e-06	-1e-05	0.830253
[TREX1.34689_at-PRKD2.38269_at]	0.000305	0.000206	0.000253	-9.8e-05	0.000576	0.000506	0.000219	0.000129	0.000376	-0.000125	0.000271	6.9e-05	0.000249	0.000126	0.00016	-4.2e-05	0.000162	0.82812
[AJ302559.216818_s_at-PTEN.211711_s_at]	-9.9e-05	-0.000114	-0.000142	-9.7e-05	-8.8e-05	-4.3e-05	-0.000106	-0.000132	-6.6e-05	-0.000173	-0.000153	-0.000156	-8e-05	-0.000161	-8.2e-05	-0.000203	-0.000135	0.827864
[TPD52.201691_s_at-FOLH1.217483_at]	0.000228	0.00012	0.000137	0.000124	0.000193	0.000261	0.0001	0.000159	0.000248	1e-05	0.000173	8.3e-05	0.000183	3.8e-05	0.000203	1.1e-05	0.000147	0.827066
[TREX1.34689_at+DDX18.208897_s_at]	0.001063	0.000933	0.001	0.000939	0.001338	0.001133	0.000992	0.001136	0.001216	0.000858	0.001098	0.00081	0.001107	0.000902	0.001063	0.000903	0.000916	0.8255
[SI.206664_at+PTEN.211711_s_at]	0.000118	0.000127	0.000168	0.000166	0.000107	0.00013	0.000125	0.000182	0.000102	0.000209	0.00018	0.000184	0.000104	0.000177	0.000107	0.000218	0.000196	-0.809039
[TNRC4.215045_at*AL536319.212606_at]	0	1e-06	1e-06	0	0	0	1e-06	1e-06	0	1e-06	1e-06	1e-06	0	1e-06	1e-06	1e-06	1e-06	-0.809623
[FCAR.211307_s_at+PTEN.211711_s_at]	0.000123	0.000126	0.000157	0.000167	0.000105	0.000117	0.000127	0.000147	0.000102	0.000212	0.000173	0.000174	0.000107	0.00018	0.000109	0.000271	0.000159	-0.810718
[AL050026.216626_at+OTUB2.219369_s_at]	6.4e-05	0.000118	0.000112	6.5e-05	7.1e-05	8.1e-05	8.3e-05	0.000177	6.7e-05	0.000246	0.000124	0.000183	0.000116	0.000136	0.000169	0.000149	0.000131	-0.811369
[CMKLR1.210659_at+PTEN.211711_s_at]	0.00023	0.000237	0.000295	0.000245	0.000176	0.000187	0.0002	0.000271	0.000235	0.000272	0.000224	0.000326	0.00015	0.000366	0.000194	0.000332	0.000288	-0.81349
[KLK3.204582_s_at+PTEN.211711_s_at]	0.000124	0.000136	0.000169	0.00018	0.000113	0.000129	0.000138	0.000163	0.000109	0.000255	0.000173	0.000183	0.000118	0.000186	0.00012	0.000229	0.000171	-0.815651
[PAX3.216059_at+NM_018601.220880_at]	2.8e-05	3.5e-05	4.9e-05	4.6e-05	1.5e-05	3.8e-05	6.4e-05	0.000102	2.4e-05	9e-05	8.1e-05	8.2e-05	3.3e-05	6.7e-05	5.1e-05	0.000116	8.7e-05	-0.822441
[AL050026.216626_at+CTAGE5.204055_s_at]	0.000118	0.000125	0.000162	6.2e-05	4.9e-05	6.5e-05	0.000141	0.000192	3.3e-05	0.000219	0.000146	0.000154	6.5e-05	0.000142	0.000117	0.000148	0.000148	-0.822875
[FZD5.206136_at+PTEN.211711_s_at]	0.000128	0.000132	0.00017	0.000175	0.000126	0.000127	0.000138	0.000171	0.000109	0.000227	0.000177	0.000188	0.000119	0.000193	0.000127	0.000231	0.00017	-0.823618
[CAMP.210244_at-SCGB1D2.206799_at]	-5e-06	1.1e-05	1e-06	2.6e-05	-9e-06	-0.000192	-2e-06	2e-06	-8.9e-05	2.7e-05	-8.2e-05	2.3e-05	-7.5e-05	5e-06	-1e-06	6e-06	3e-06	-0.825011
[SGTA.201396_s_at*PIP5K1C.212518_at]	0	1e-06	0	0	0	0	1e-06	1e-06	0	1e-06	0	1e-06	0	1e-06	1e-06	1e-06	1e-06	-0.825029
[PLA2G2F.215870_s_at-RARRES2.209496_at]	-0.00021	-0.000155	-0.000337	-0.000203	-0.000212	-0.000541	-0.000185	-0.00017	-0.000227	-0.000143	-0.00023	-0.000136	-0.000311	-0.000103	-0.000204	-0.000155	-0.000181	-0.827169
[BPI.205557_at+PTEN.211711_s_at]	0.000136	0.000151	0.000172	0.000175	0.00011	0.000148	0.000143	0.000169	0.000113	0.000221	0.000186	0.000201	0.000122	0.000198	0.000145	0.000223	0.000174	-0.8328
[AI478300.217526_at-TREX1.34689_at]	-0.000235	-0.000159	-0.000238	-0.000133	-0.000299	-0.000261	-0.000202	-8.7e-05	-0.000335	-7.9e-05	-0.000327	-0.000174	-0.000268	-7.6e-05	-0.000203	0.000118	-8.7e-05	-0.833162
[AL050026.216626_at+PTEN.211711_s_at]	0.000123	0.00017	0.000227	0.000193	0.000128	0.000168	0.000135	0.000223	0.000107	0.00036	0.000184	0.000211	0.000146	0.000244	0.000193	0.000271	0.000245	-0.834012
[PTEN.211711_s_at-PTPRN2.203030_s_at]	7.4e-05	0.000113	0.000127	0.000146	8.3e-05	9.9e-05	0.000107	0.000129	6.8e-05	0.000182	0.000115	0.000145	8.5e-05	0.000158	9.3e-05	0.0002	0.00014	-0.835834
[OTUB2.219369_s_at+PTEN.211711_s_at]	0.000173	0.000196	0.000193	0.000198	0.000149	0.000139	0.000194	0.000242	0.000158	0.000296	0.000272	0.000296	0.000166	0.000236	0.000178	0.000306	0.000182	-0.8386
[FOLH1.217483_at-SCGB1D2.206799_at]	3.2e-05	7.5e-05	4.3e-05	2.8e-05	1.6e-05	-5.5e-05	1e-05	6.5e-05	-5.7e-05	0.000143	-5.1e-05	0.000176	1.9e-05	0.000109	1.2e-05	0.000139	0.00012	-0.839978
[RAB14.200928_s_at+PTEN.211711_s_at]	0.000288	0.000299	0.000282	0.000309	0.000254	0.000292	0.000249	0.000325	0.000218	0.00034	0.000304	0.000321	0.000243	0.000326	0.000313	0.000346	0.000316	-0.841686
[GALNT10.212256_at*SHANK2.213307_at]	0	1e-06	0	0	0	0	0	1e-06	0	1e-06	0	1e-06	0	1e-06	1e-06	1e-06	1e-06	-0.848105
[NM_004908.208254_at+PTEN.211711_s_at]	0.000126	0.000139	0.000167	0.000176	0.00011	0.000135	0.000134	0.000177	0.00011	0.000223	0.000173	0.000177	0.000106	0.000183	0.000115	0.000225	0.000181	-0.848561
[SPRED2.212458_at*DDN.214788_x_at]	1e-06	2e-06	2e-06	1e-06	1e-06	0	1e-06	2e-06	0	2e-06	1e-06	2e-06	1e-06	2e-06	1e-06	2e-06	1e-06	-0.85116
[FADS1.217462_at+PTEN.211711_s_at]	0.000122	0.000179	0.00017	0.000175	0.000106	0.000119	0.000126	0.000163	0.000103	0.000209	0.000171	0.00019	0.000106	0.00018	0.000119	0.000226	0.000159	-0.86774
[N25732.204131_s_at/AF043586.216394_x_at]	32.7627	80.1875	75	63.6522	31.6154	19.8197	61.76	68.16	55	86.7619	25.4444	97.95	12.2905	79.1429	36.7667	82.2105	68.1667	-0.903099
[C3orf63.209285_s_at*DDN.214788_x_at]	1e-06	3e-06	3e-06	2e-06	1e-06	0	2e-06	3e-06	1e-06	4e-06	2e-06	3e-06	2e-06	3e-06	2e-06	3e-06	3e-06	-0.903609

## Sheet: Braak
51	17
Braak	5	6	6	1	3	6	4	5	6	1	2	5	6	6	6	6	6	1
[ST3GAL4.203759_at+LRRC48.208140_s_at]	0.000274	0.000299	0.000434	0.000223	0.000274	0.000382	0.000255	0.00029	0.000413	0.000202	0.00025	0.000287	0.000343	0.000319	0.000598	0.000433	0.000385	0.913812
[LRRC48.208140_s_at*ATP5E.217801_at]	0	1e-06	1e-06	0	0	1e-06	0	0	1e-06	0	0	1e-06	1e-06	1e-06	1e-06	1e-06	1e-06	0.891149
[LRRC48.208140_s_at*COX4I1.200086_s_at]	0	1e-06	1e-06	0	0	1e-06	0	0	1e-06	0	0	1e-06	1e-06	1e-06	1e-06	1e-06	1e-06	0.891149
[LRRC48.208140_s_at*DOCK4.205003_at]	0	1e-06	1e-06	0	0	1e-06	0	0	1e-06	0	0	1e-06	1e-06	1e-06	1e-06	1e-06	1e-06	0.891149
[LRRC48.208140_s_at/SLC6A1.205152_at]	0.053597	0.060567	0.111152	0.041667	0.041399	0.061397	0.033372	0.04723	0.074047	0.04051	0.028617	0.058376	0.163862	0.078623	0.216538	0.092674	0.076007	0.885391
[PRDM2.216445_at-CASP9.210775_x_at]	-0.000486	-0.000416	-0.000427	-0.000486	-0.00051	-0.000428	-0.000473	-0.000473	-0.000392	-0.000508	-0.000515	-0.000473	-0.0004	-0.000394	-0.000458	-0.000263	-0.000402	0.88091
[NPAL3.210267_at+LRRC48.208140_s_at]	0.000134	0.000206	0.000318	9.6e-05	0.00016	0.000198	0.000105	0.000111	0.000215	0.000104	6.8e-05	0.000168	0.000203	0.000191	0.000346	0.000212	0.000163	0.878755
[C1orf89.220963_s_at+LRRC48.208140_s_at]	0.000224	0.000257	0.000391	0.000177	0.000232	0.000318	0.00017	0.000206	0.000326	0.000184	0.000146	0.00025	0.00034	0.000298	0.000442	0.000331	0.000269	0.876133
[COPZ2.219561_at-RANBP9.202583_s_at]	-0.000374	-3.9e-05	-0.000143	-0.000398	-0.000391	-0.00016	-0.000334	-0.0003	-0.000311	-0.000507	-0.000373	-0.000348	-0.000192	-0.000287	6.4e-05	-0.0001	-0.000274	0.87554
[LRRC48.208140_s_at/CHRDL1.209763_at]	0.242888	0.324885	0.646552	0.125392	0.321875	0.498442	0.133803	0.244706	0.530504	0.169847	0.096774	0.302632	0.5	0.339246	1.35526	0.347418	0.498141	0.875476
[LRRC48.208140_s_at-ITGB1.216190_x_at]	9.1e-05	0.000117	0.000283	5.8e-05	0.0001	0.000156	3.1e-05	9.4e-05	0.000176	5.8e-05	1.4e-05	0.000107	0.000168	0.000131	0.000303	0.00014	0.000123	0.874692
[AL110206.216465_at+LRRC48.208140_s_at]	0.000182	0.000234	0.000372	9.8e-05	0.000131	0.000328	0.000102	0.000157	0.000325	0.000101	0.000185	0.000224	0.000301	0.000319	0.000448	0.000242	0.000196	0.873511
[AJ251844.216362_at+LRRC48.208140_s_at]	0.000126	0.000154	0.000349	9.4e-05	0.000116	0.000193	0.000111	0.000125	0.000224	9.7e-05	0.000137	0.000178	0.000206	0.000205	0.000361	0.000215	0.000188	0.873511
[SLC47A1.219525_at+PTBP1.211270_x_at]	0.000754	0.000967	0.000747	0.000642	0.000746	0.001434	0.000744	0.000914	0.001068	0.000568	0.000693	0.000708	0.001916	0.001867	0.001061	0.001093	0.001023	0.871548
[ZNF506.221626_at+LRRC48.208140_s_at]	0.000313	0.00037	0.000431	0.000206	0.000262	0.000404	0.000221	0.000303	0.000412	0.00026	0.000262	0.000396	0.00048	0.000355	0.000553	0.000407	0.000457	0.871417
[ITGB1.216178_x_at+LRRC48.208140_s_at]	0.000142	0.000178	0.000306	0.000111	0.000112	0.000239	6.3e-05	0.00012	0.000246	0.00013	6.1e-05	0.000167	0.000243	0.000187	0.000336	0.000173	0.000229	0.870888
[WWTR1.202133_at*TBC1D5.201813_s_at]	0	1e-06	1e-06	0	0	1e-06	0	0	2e-06	0	0	1e-06	1e-06	1e-06	1e-06	1e-06	1e-06	0.870138
[MRPS11.215919_s_at+LRRC48.208140_s_at]	0.000176	0.000217	0.000355	0.000149	0.000153	0.000275	0.000132	0.000222	0.000245	0.000173	0.00012	0.000201	0.000271	0.000227	0.000423	0.000273	0.000247	0.869579
[GJC2.214302_x_at-CASP9.210775_x_at]	-0.000494	-0.000418	-0.000466	-0.000495	-0.000509	-0.000477	-0.000483	-0.000512	-0.000398	-0.000522	-0.000524	-0.000492	-0.000418	-0.000408	-0.000462	-0.000349	-0.000394	0.868789
[LRRC48.208140_s_at/PTN.209466_x_at]	0.079684	0.083088	0.210379	0.039196	0.063738	0.114943	0.039419	0.091873	0.110558	0.053198	0.041958	0.092211	0.156118	0.118329	0.319545	0.132025	0.135081	0.868268
[LRRC48.208140_s_at-BCAP29.205084_at]	-3.2e-05	5e-05	0.000134	-0.000211	4e-06	2.6e-05	-1.2e-05	2.9e-05	6.1e-05	-5.3e-05	-4e-05	9e-06	0.000167	3.4e-05	0.000299	5.3e-05	2e-05	0.867814
[RHOQ.212122_at+COPZ2.219561_at]	0.000346	0.000508	0.000544	0.00032	0.000342	0.000525	0.000335	0.000353	0.000583	0.00018	0.000183	0.000446	0.000412	0.000374	0.000598	0.000458	0.000378	0.866957
[LRRC48.208140_s_at-SLC1A4.209611_s_at]	1.1e-05	2.3e-05	0.000119	-0.000173	-9e-06	-2e-06	-0.000104	-2.7e-05	3.7e-05	-8.8e-05	-0.000104	-7.7e-05	4.8e-05	4.7e-05	0.000197	0.000117	2.5e-05	0.865434
[DNAI2.220636_at+ZNF506.221626_at]	0.000262	0.000306	0.000303	0.000184	0.000227	0.000359	0.0002	0.00023	0.000274	0.000206	0.000273	0.000277	0.000618	0.000286	0.000407	0.000286	0.00038	0.864854
[GJA5.214466_at+LRRC48.208140_s_at]	0.000158	0.000181	0.000338	0.000121	0.000128	0.000191	6.6e-05	0.000154	0.000217	0.00015	7.7e-05	0.000179	0.000218	0.000166	0.000355	0.000233	0.000229	0.864296
[CASP9.210775_x_at-ADH1C.206262_at]	0.000477	0.000411	0.000472	0.000495	0.000492	0.000465	0.000475	0.000511	0.000404	0.00052	0.000518	0.000493	0.000407	0.000413	0.000462	0.000317	0.000337	-0.870888
[CASP9.210775_x_at-PRDM12.220894_x_at]	0.000498	0.000416	0.000462	0.000492	0.000517	0.00048	0.000486	0.000492	0.000334	0.000519	0.000518	0.000483	0.000407	0.000403	0.00046	0.000362	0.000406	-0.872827
[CASP9.210775_x_at-NM_014724.206507_at]	0.000397	0.000304	0.00035	0.000413	0.000372	0.000357	0.000401	0.00036	0.000281	0.000381	0.000443	0.000364	0.00026	0.000257	0.000261	0.000303	0.000197	-0.872965
[CGGBP1.214050_at-LRRC48.208140_s_at]	9e-06	-0.000121	-0.000231	2e-05	-2.6e-05	-6.7e-05	9e-06	-3e-05	-0.000126	8.4e-05	1.6e-05	-8e-05	-5.9e-05	-0.000137	-0.000281	-0.000132	-9.4e-05	-0.873014
[CASP9.210775_x_at-RENBP.206617_s_at]	0.000493	0.000383	0.000435	0.000469	0.000501	0.000434	0.000458	0.000435	0.000333	0.000502	0.000505	0.000441	0.000374	0.000395	0.00042	0.000334	0.000392	-0.873471
[KIAA1659.215674_at-LRRC48.208140_s_at]	-9.3e-05	-0.000125	-0.000299	-2.8e-05	-8.2e-05	-0.000123	-4.5e-05	-6.3e-05	-0.000197	-4.2e-05	-5.1e-05	-0.000122	-0.000135	-0.000124	-0.000283	-0.000104	-0.000106	-0.873525
[CASP9.210775_x_at-MEOX2.206202_at]	0.000503	0.000426	0.000479	0.000503	0.000525	0.00048	0.000487	0.000521	0.000406	0.000528	0.000529	0.000486	0.00035	0.000414	0.000459	0.000371	0.000413	-0.873951
[HPGD.211549_s_at-LRRC48.208140_s_at]	-7.4e-05	-0.000107	-0.000216	-7e-05	-9.3e-05	-0.000119	-4e-05	-0.000101	-0.000179	-3.5e-05	-4.7e-05	-9.7e-05	-0.00011	-0.000146	-0.000305	-0.000105	-9.8e-05	-0.874175
[CASP9.210775_x_at-DLGAP2.216916_s_at]	0.000481	0.000413	0.000467	0.000493	0.000516	0.000477	0.000482	0.000515	0.000388	0.000518	0.000515	0.000484	0.000409	0.000402	0.00045	0.000351	0.000383	-0.876053
[CASP9.210775_x_at-AW408767.217608_at]	0.000429	0.000383	0.000403	0.000477	0.000466	0.000408	0.000445	0.000467	0.000285	0.000469	0.000453	0.000454	0.000327	0.000366	0.000415	0.000335	0.000345	-0.87684
[CASP9.210775_x_at-TRBV6-4.216578_at]	0.000492	0.000412	0.000461	0.000493	0.000513	0.000475	0.000477	0.000496	0.000398	0.000514	0.000498	0.000485	0.00041	0.000402	0.000441	0.000358	0.000386	-0.877444
[R71245.217654_at-LRRC48.208140_s_at]	2.7e-05	-5.3e-05	-0.000194	7.2e-05	1.7e-05	-1e-05	3.7e-05	4.3e-05	-0.000159	5.2e-05	6.3e-05	-3e-06	-5.5e-05	-8.8e-05	-0.000206	-6.9e-05	8e-06	-0.877444
[LCE2B.207710_at-LRRC48.208140_s_at]	-8.3e-05	-0.000126	-0.000292	-6.8e-05	-7.3e-05	-0.000123	-4.6e-05	-6e-05	-0.000192	-4.1e-05	-3.7e-05	-0.00011	-0.000122	-0.000131	-0.000305	-0.000112	-0.00012	-0.878799
[CASP9.210775_x_at-FETUB.214417_s_at]	0.000415	0.000351	0.000393	0.000431	0.000442	0.00038	0.000442	0.000416	0.000351	0.00043	0.000501	0.000427	0.000264	0.000329	0.000391	0.000322	0.000347	-0.879239
[CASP9.210775_x_at+GSTA3.222102_at]	0.00052	0.000443	0.000492	0.00053	0.000541	0.000519	0.000525	0.000536	0.000421	0.000555	0.000575	0.000519	0.000498	0.00043	0.000501	0.000434	0.000481	-0.879333
[CASP9.210775_x_at-CSH2.208342_x_at]	0.000495	0.000414	0.000471	0.000496	0.000514	0.00048	0.000485	0.000509	0.0004	0.000523	0.000515	0.000487	0.000403	0.000403	0.000455	0.000359	0.000398	-0.880595
[CASP9.210775_x_at+C6orf106.217924_at]	0.000605	0.000528	0.000589	0.000681	0.000642	0.000561	0.000614	0.000605	0.000537	0.000642	0.000714	0.000676	0.000449	0.000535	0.000515	0.000467	0.000599	-0.882452
[MAB21L1.206163_at-LRRC48.208140_s_at]	-6.8e-05	-0.000118	-0.00022	-2.6e-05	-3.4e-05	-7.4e-05	-2.1e-05	-3.3e-05	-0.000138	-2.6e-05	-2.6e-05	-6.3e-05	-0.000104	-0.000134	-0.000233	-0.000107	-8.7e-05	-0.882971
[FLJ22222.219254_at-LRRC48.208140_s_at]	-0.000104	-0.000119	-0.000274	-6.2e-05	-9.7e-05	-0.000135	-5.3e-05	-8.6e-05	-0.000175	-7.8e-05	-4.5e-05	-0.000112	-0.000159	-0.000136	-0.000295	-0.000136	-0.000124	-0.88461
[CASP9.210775_x_at-X97875.217158_at]	0.000428	0.000383	0.000415	0.000468	0.000441	0.000394	0.000478	0.000454	0.000339	0.000472	0.000459	0.000419	0.000356	0.00031	0.000386	0.000247	0.000362	-0.886709
[CASP9.210775_x_at-ELF3.201510_at]	0.000484	0.000342	0.000417	0.000492	0.000458	0.000421	0.00044	0.000457	0.000372	0.0005	0.000515	0.000433	0.000269	0.000323	0.000386	0.000363	0.000348	-0.888418
[C15orf39.204494_s_at/LRRC48.208140_s_at]	1.90991	1.58156	0.773333	2.2625	2.16505	1.6	3.24561	1.90385	1.13	2.53933	3.55556	1.82609	0.740541	1.33987	0.546926	1.26351	0.947761	-0.891864
[CASP9.210775_x_at-LRRC48.208140_s_at]	0.000398	0.000287	0.000183	0.000424	0.000427	0.00034	0.000438	0.000423	0.000208	0.000444	0.000479	0.000341	0.000244	0.000264	0.000164	0.000227	0.000282	-0.89462
[CASP9.210775_x_at+DENND4A.214787_at]	0.000665	0.000588	0.000622	0.000678	0.000679	0.000645	0.000659	0.000668	0.000593	0.000721	0.000712	0.000671	0.000568	0.000617	0.000658	0.000526	0.000576	-0.89462
[CASP9.210775_x_at-RGS3.220300_at]	0.00049	0.000402	0.000435	0.000494	0.00051	0.000375	0.000482	0.000447	0.000326	0.000513	0.00051	0.000478	0.000277	0.000363	0.000379	0.000327	0.000371	-0.902022
